# Supplementary material
Source: Springer Nature journal article supplement (https://www.springerprofessional.de/resource/supplementary/13638_2011_541_MOESM2_ESM.pdf/11897734)

Analytical BEP for Different Channel Conditions DF N=4

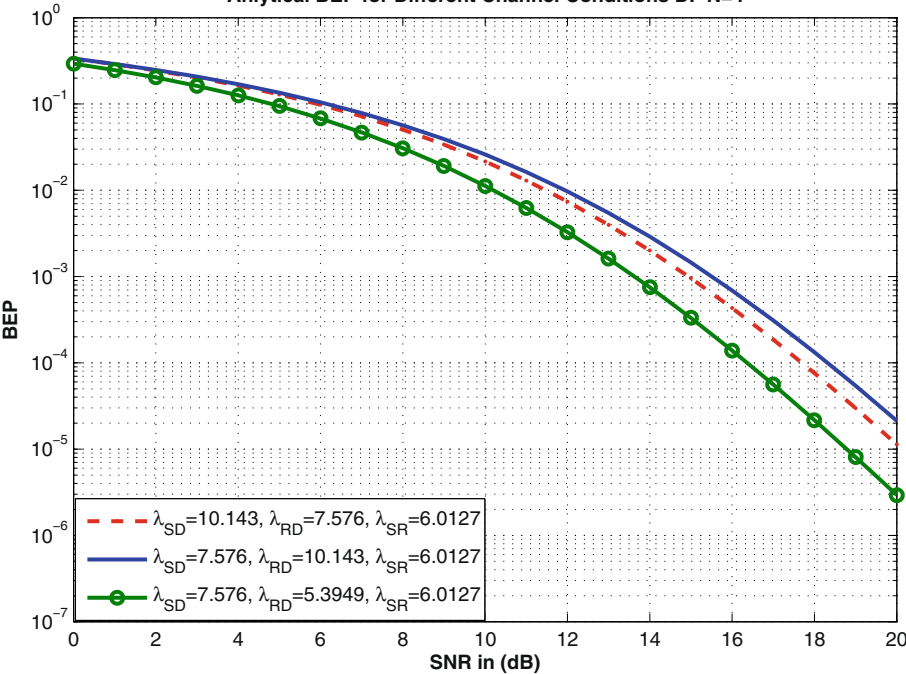

Supplement: MOESM2 [file 11897734]
